# Supplementary material
Source: MDPI journal article supplement (https://www.mdpi.com/2073-4395/12/5/1005)
Supplement: s1 [file s1]

Archive with 2 entries (2 files):
- Figure S1-S7.pdf
- Table S1-S3.xlsx
