# Supplementary material
Source: MDPI journal article supplement (https://www.mdpi.com/2073-4395/12/5/1005)
Supplement: s1 [file s1 › Figure S1-S7.pdf]

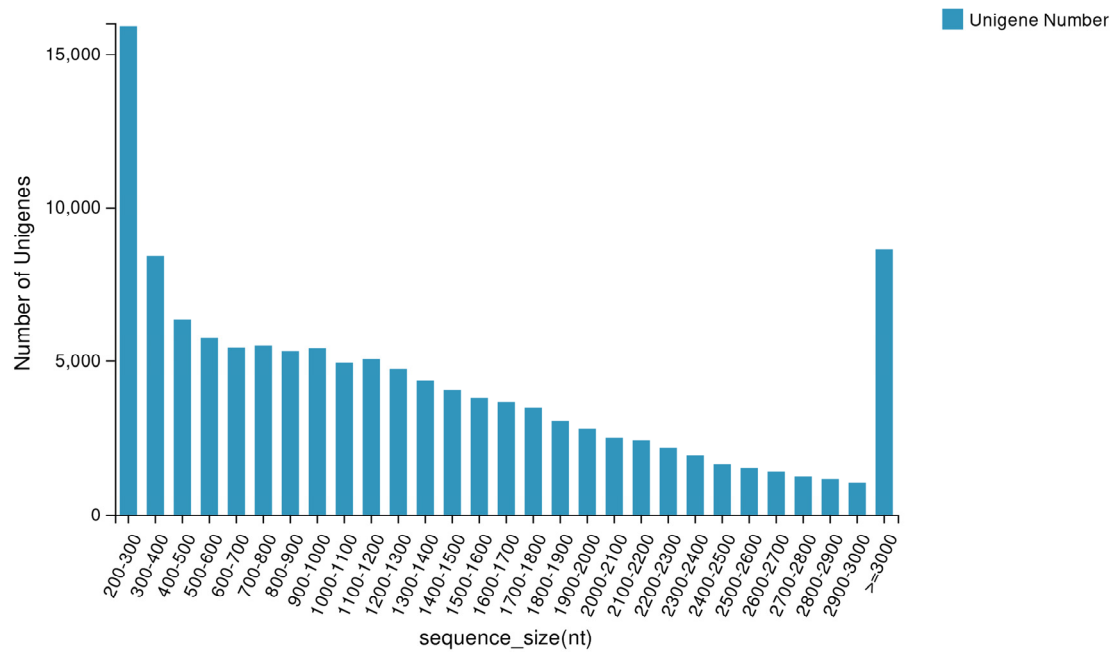

Figure S1: Length distribution of unigenes

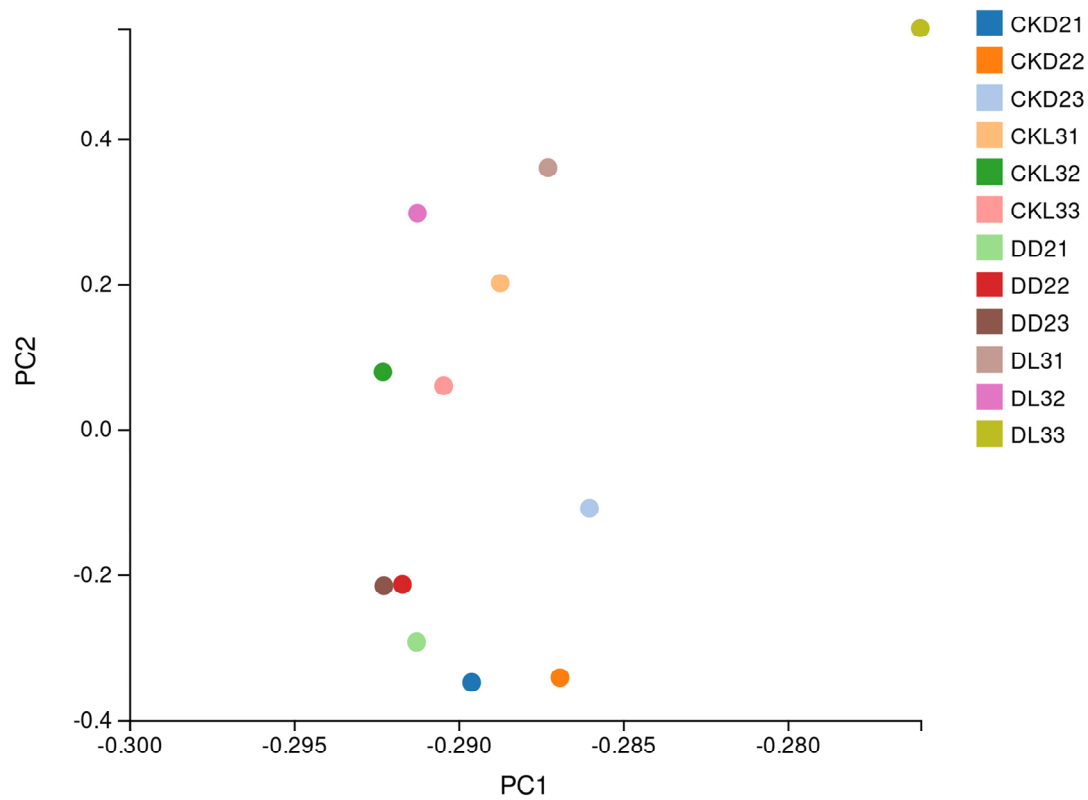

Figure S2: Principal component analysis among the 12 samples of *Avena sativa*

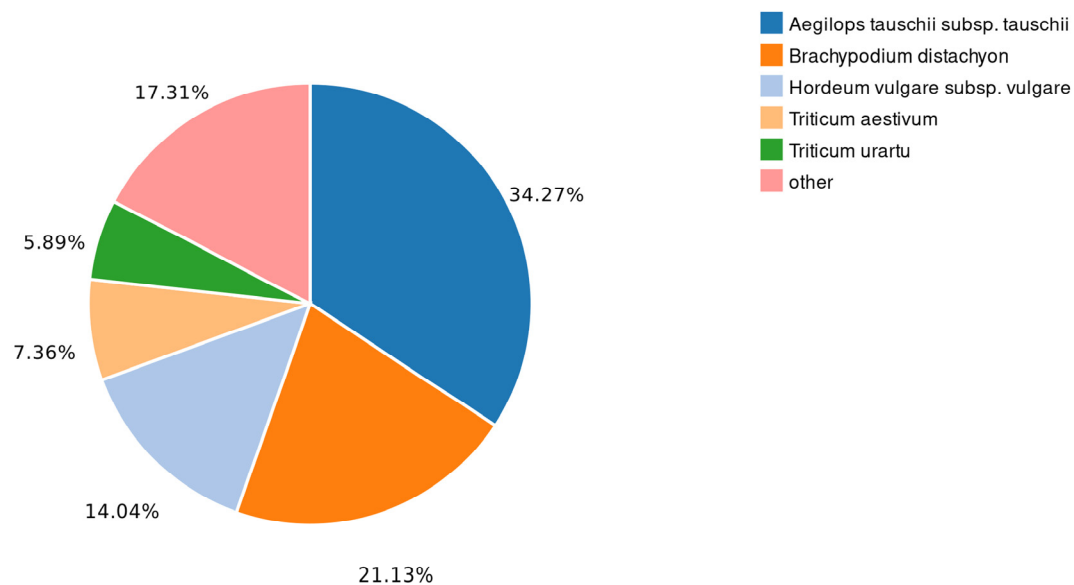

Figure S3: Similarities of *Avena sativa* to other species

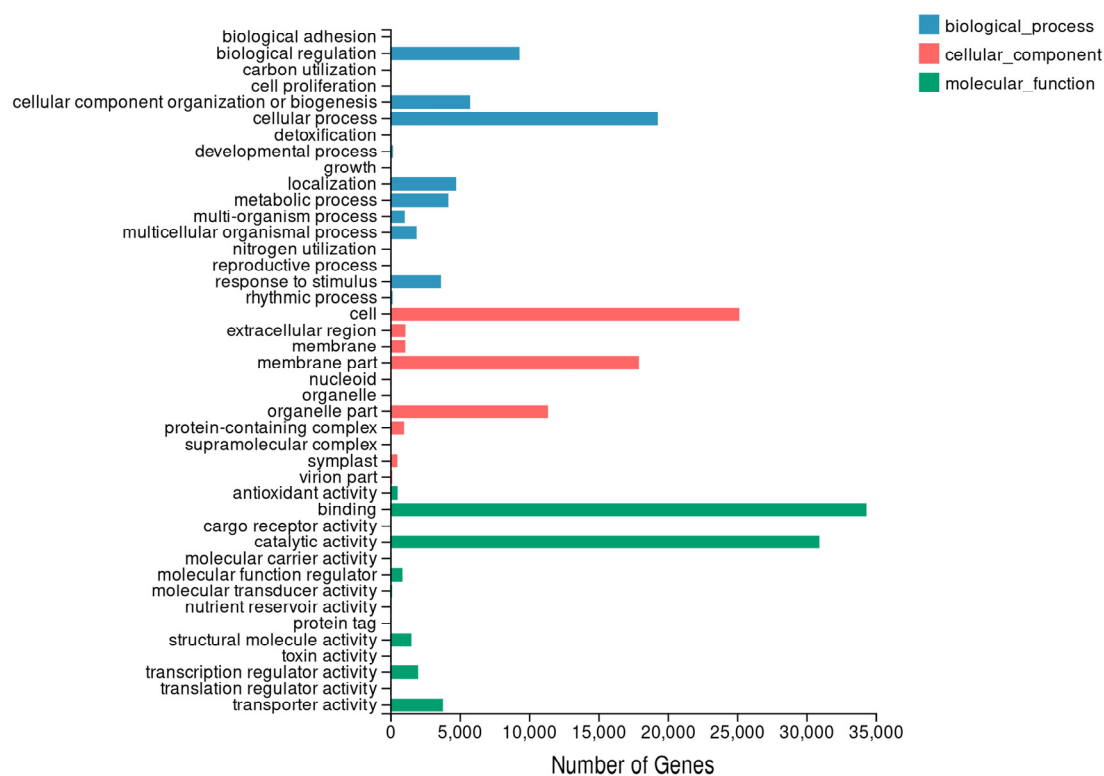

Figure S4: Annotation of the assembled unigenes in *Avena sativa* transcriptome in GO database

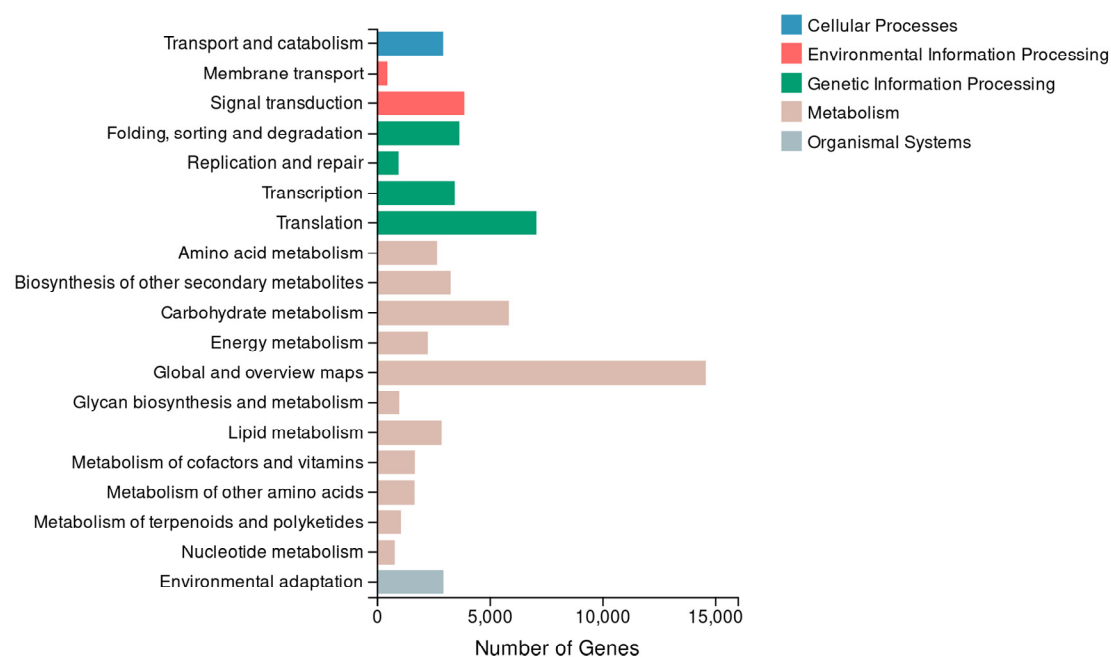

Figure S5: Annotation of the assembled unigenes in *Avena sativa* transcriptome in KEGG database

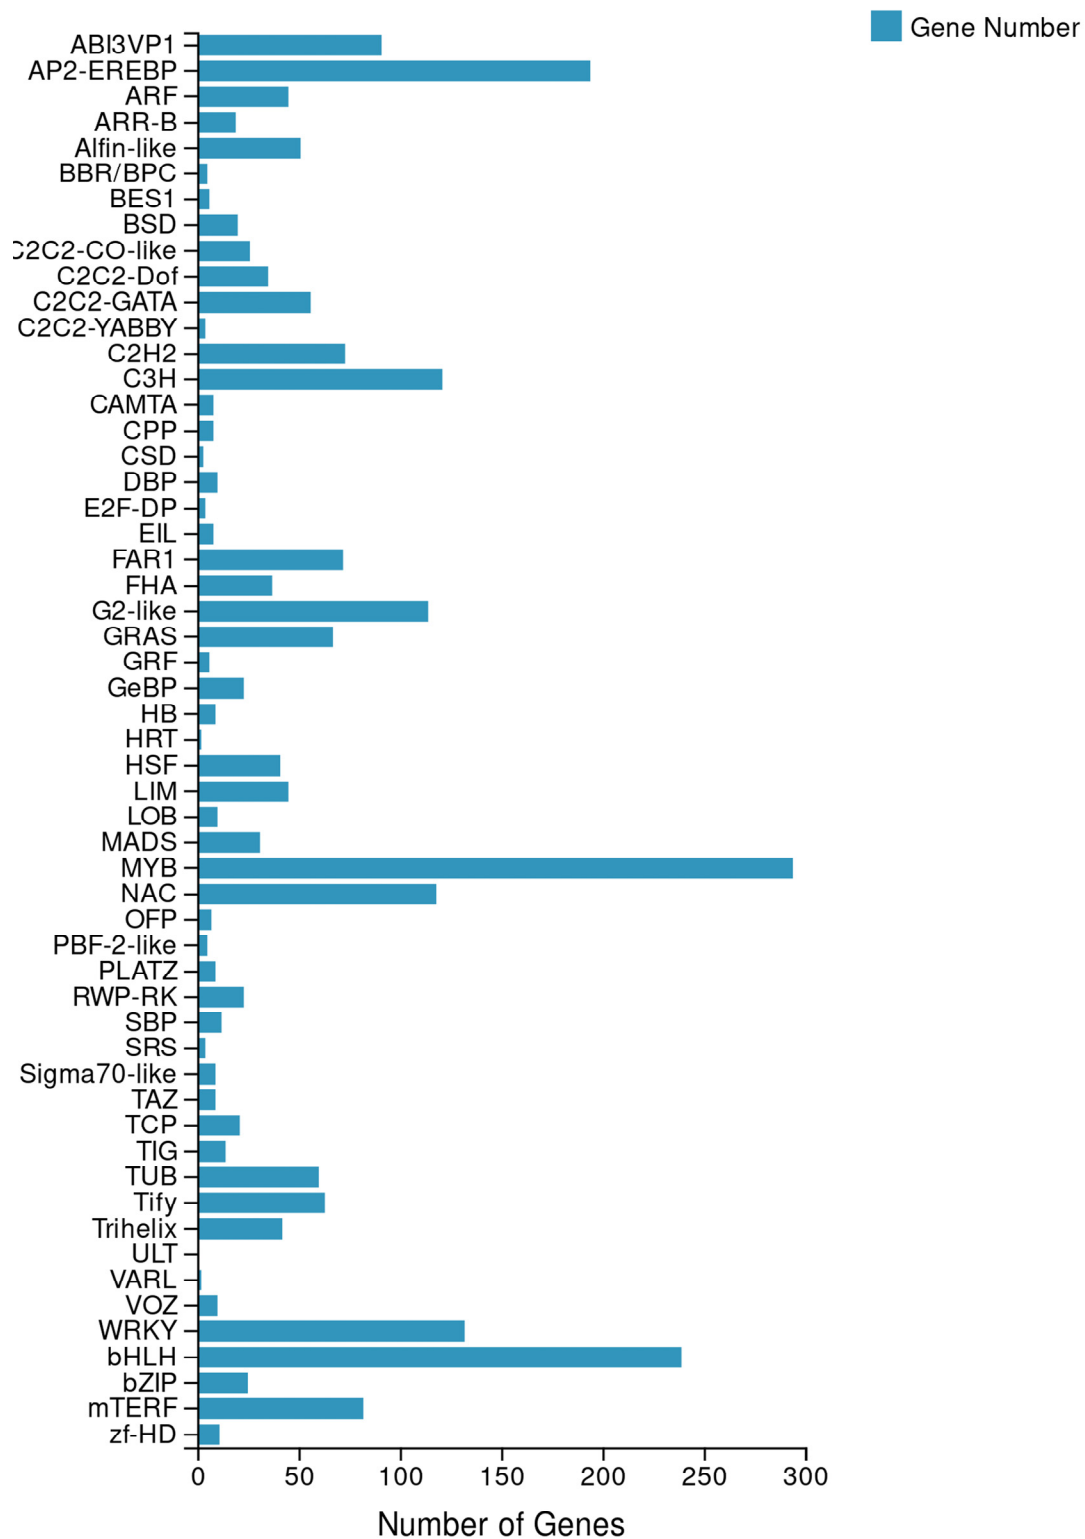

Figure S6: Annotation of the assembled unigenes in *Avena sativa* transcriptome in TF database

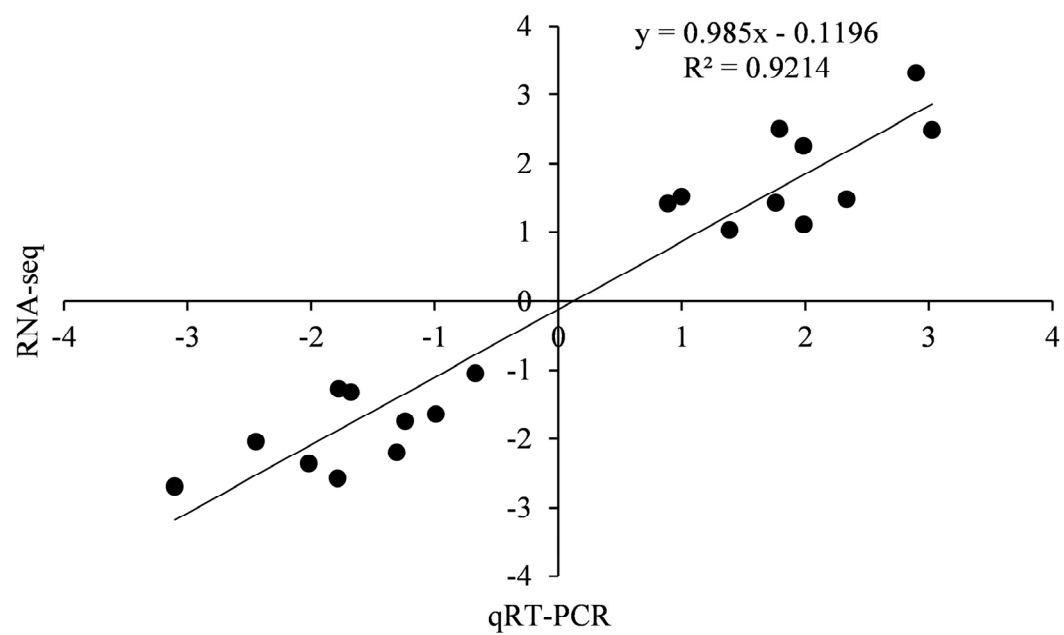

Figure S7: The relative expression levels of 20 DEGs identified in the comparison between RNA-Seq and qRT-PCR
