# Supplementary material
Source: MDPI journal article supplement (https://www.mdpi.com/2073-4395/12/5/1005)
Supplement: s1 [file s1 › Table S1-S3.xlsx]

## Sheet: Table S1
Table S1 Specific primer pairs for qRT-PCR
Gene ID	Forward primer	Reverse primer
CL3003.Contig1_All	AGTTACCACCGTGGAATCCG	CGTTCTCCGAGGACATGATGA
CL14462.Contig12_All	ATCAGCGGAGCCTGATAAGC	ATGTCAGCGAGCCAATGGAA
Unigene24274_All	AGGCTCCGTTCCATGTCTTG	CATGGACAGAGATCGAGGCG
CL15850.Contig1_All	TAGCAGCAAGCAGCTAGCAA	TGTCGATCTTGCCGAAGAGG
CL2991.Contig2_All	AGGCTCCGTTCCATGTCTTG	TCAACATCCAGGTGGTCTGC
Unigene7284_All	CCACCTTCTACCTGTCGTCG	AGTAGGTGTGGAACGCCTTG
Unigene4975_All	GTCAAGACGGACTGGACCAAG	GGGGTCGGTACAGTAGTTGT
CL581.Contig2_All	GTCATGTCGTCGGAGAACGA	AACATGCAGCGCAGTAGAGT
Unigene588_All	GATTGAGAGACGACGGGGAC	CACGGGCTTCAGGAAGAACT
Unigene19052_All	TACTGCATGCCGGAGATGAC	TCACGATGAAATCCTCGGCG
CL15866.Contig3_All	GGCAAGTACTGGAGGAACCC	GTTCAAGCGTGATGAAGCCC
CL924.Contig7_All	GCCATGGAGTCGGAGAAGAT	CTCCGCTTCTTTCGTGAGCA
CL216.Contig2_All	CGCCATCAACAAAGGTGAGG	TACCTAGTAGCATCGGGGGC
CL2017.Contig5_All	CCGACGTCCATAACCTGTCC	GAACATCATCGGCGCCATTC
CL5176.Contig1_All	AGAACTCCATCGTGCAGTCG	CGATCATGGAGTCGACGGAG
Unigene26593_All	GACACATCCAGACCACTCGG	CGCTTCGTAGAAGAGGTCCG
CL15102.Contig10_All	GTGGAGAAGTGGTCGTCGTT	TCGCGAGAAACCTATGGAGC
Unigene20707_All	CAGAGTCAGACAGGAGCAGC	ATTTCCGTCGACTCTCAGCG
CL1579.Contig1_All	GATGGACAAGGCGTCGATCA	TCATCGACGAGACCGAAAGC
CL280.Contig32_All	AGCCGACATCAAGTGAAGCA	TGCCTCTGCCTTTGCACTAA

## Sheet: Table S2
Table S2 Overview of the RNA-sequencing reads generated from each sample
	Total raw reads (M)	Total clean reads (M)	Total clean bases (Gb)	Q20 (%)	Q30 (%)
A1	45.57	42.49	6.37	96.88	89.06
A2	45.57	42.09	6.31	96.77	88.69
A3	45.57	42.7	6.4	97.03	89.33
B1	45.57	42.3	6.34	96.78	88.72
B2	45.57	42.11	6.32	96.43	87.78
B3	47.33	43.5	6.52	96.55	88.19
C1	45.57	42.64	6.4	97.09	89.6
C2	45.57	42.5	6.37	96.78	88.71
C3	45.57	42.72	6.41	96.89	88.99
D1	45.57	42.24	6.34	96.84	88.87
D2	45.57	42.36	6.35	96.78	88.75
D3	45.57	42.71	6.41	97.06	89.47

## Sheet: Table S3
Table S3 Unigene statistics
	Total Number	Total Length	Mean Length	GC(%)
A1	52526	48809601	929	49.44
A2	55550	50907767	916	49.64
A3	60508	57087132	943	48.56
B1	60351	56763514	940	49.17
B2	54257	52319326	964	49.15
B3	52410	49349787	941	49.54
C1	58589	53620262	915	49.07
C2	52286	48341933	924	49.06
C3	58895	55272860	938	48.82
D1	62373	59856695	959	48.51
D2	61554	60462522	982	48.91
D3	60911	59450753	976	48.79
All-unigene	123223	162582089	1319	48.51
